# Supplementary material for: p85S6K sustains synaptic GluA1 to ameliorate cognitive deficits in Alzheimer’s disease
Source: PubMed Central journal article supplement (PMC9827685; doi:10.1186/s40035-022-00334-w), 2023-01-09
Supplement: 40035_2022_334_MOESM1_ESM.pdf [file 40035_2022_334_MOESM1_ESM.pdf]

## Supplementary Information

### **p85S6K sustains synaptic GluA1 to ameliorate cognitive deficits in Alzheimer's disease**

Jia-Bing Li, Xiao-Yu Hu, Mu-Wen Chen, Cai-Hong Xiong, Na Zhao, Yan-hui Ge, Hao Wang, Xiao-Ling Gao, Nan-Jie Xu, Lan-Xue Zhao, Zhi-hua Yu, Hong-Zhuan Chen \*, Yu Qiu\*

## Supplementary Table

**Table S1** Information of brain donors in this study

| Diagnosis        | Non-demented control(n=13) | Alzheimer's disease(n=17) |
|------------------|----------------------------|---------------------------|
| Age (Year)       |                            |                           |
| Mean $\pm$ SD    | 76.36 $\pm$ 10.94          | 76.76 $\pm$ 8.33          |
| Range            | 60-96                      | 61-88                     |
| Gender           |                            |                           |
| Male             | 3                          | 6                         |
| Female           | 10                         | 11                        |
| APOE             |                            |                           |
| APOE3            | 5                          | 9                         |
| APOE4            | 8                          | 8                         |
| Braak            |                            |                           |
| Mean $\pm$ SD    | 1.64 $\pm$ 1.21            | 5.53 $\pm$ 0.51           |
| Range            | 1-5                        | 5-6                       |
| PMD(h)           |                            |                           |
| Mean $\pm$ SD    | 6.08 $\pm$ 1.25            | 5.07 $\pm$ 0.85           |
| Range            | 4.17-8.42                  | 3.83-6.42                 |
| Brain weight(kg) |                            |                           |
| Mean $\pm$ SD    | 1.18 $\pm$ 0.122           | 1.04 $\pm$ 0.146          |
| Range            | 0.978-1.429                | 0.835-1.355               |

## Supplementary Figures and Figure legends

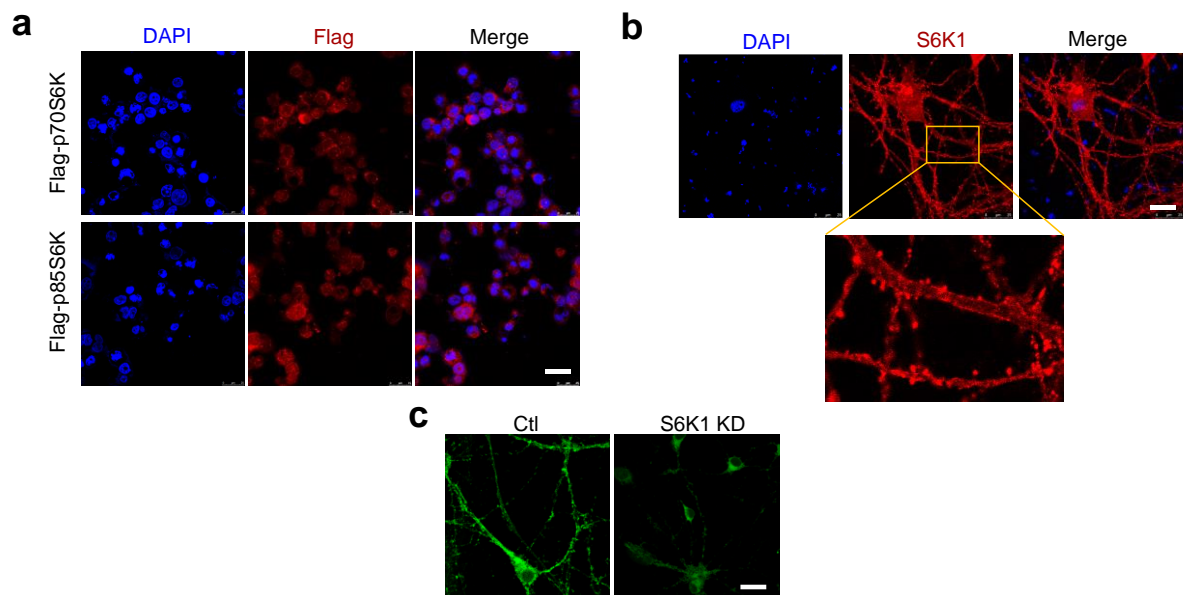

**Fig. S1** The expression pattern of S6K1 in HEK293 cells and neurons. **a** The expression pattern of exogenously expressed p85S6K and p70S6K in HEK293 cells. **b** The expression pattern of endogenous S6K1 using the anti-p70S6K antibody which recognized both p85S6K and p70S6K in cultured neurons. **c** S6K1 was immunostained after S6K1 was knocked down by infecting cultured neurons with lentiviruses expressing S6K1 shRNA (S6K1 KD). Scale bar: 25  $\mu$ m. Representative images of 3 independent experiments.

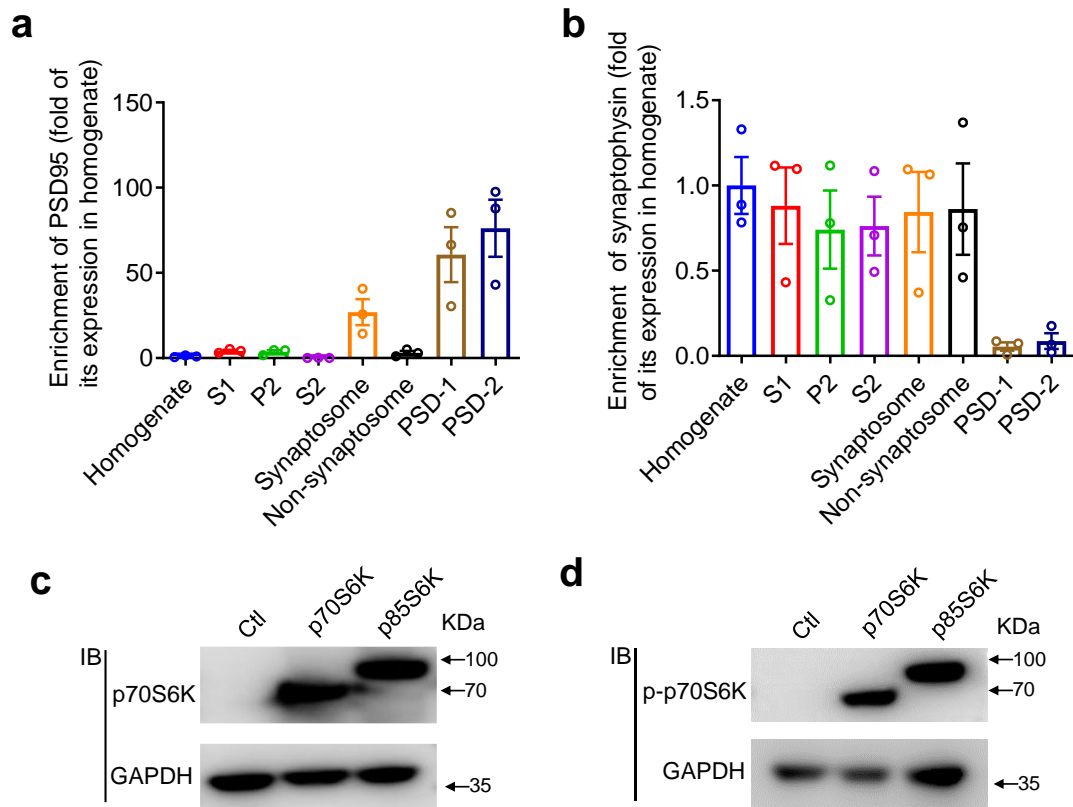

**Fig. S2** The quantification of PSD95 and synaptophysin in fractions and the validation of p70S6K antibodies. **a, b** The quantification of PSD95 (a) and synaptophysin (b) in fractions shown in Fig. 1a. **c, d** Anti-p70S6K and anti-phosphorylated p70S6K (p-p70S6K) antibodies detected p70S6K and p85S6K (c) and their phosphorylated form (d) similarly. HEK293 cells were transfected with same amounts of Flag-p70S6K and Flag-p85S6K plasmids. Data are presented as mean  $\pm$  SEM. n = 3 independent experiments.

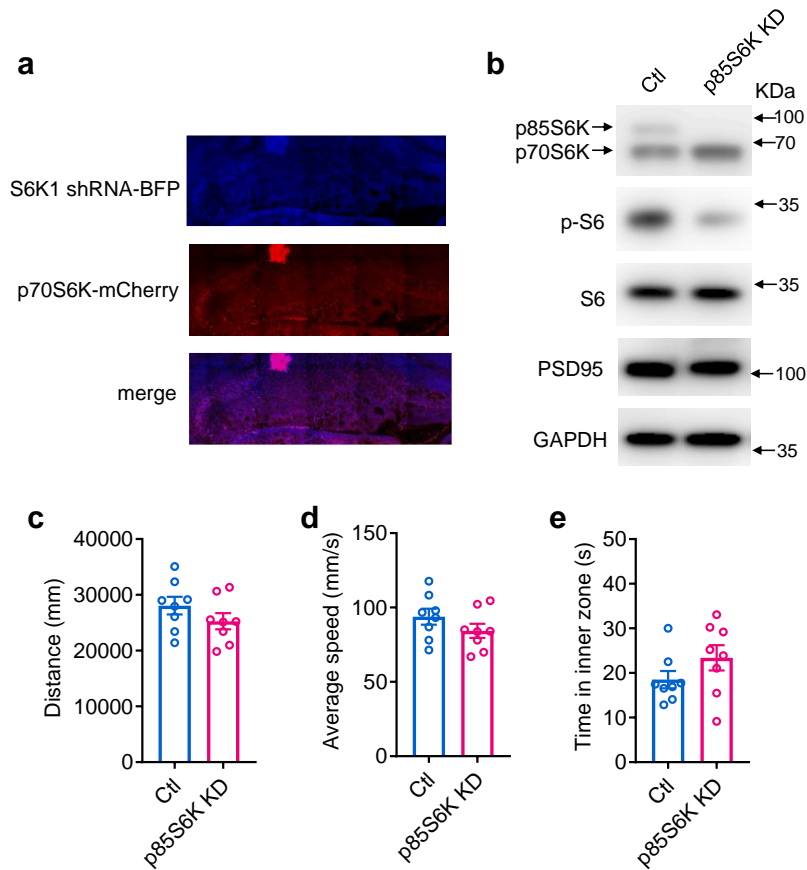

**Fig. S3** Knockdown of p85S6K efficiently reduces p85S6K in PSD-1 and does not affect the locomotor activity and anxiety-like behavior. **a** Colocalization of S6K1 shRNA and p70S6K overexpression showed by their corresponding linked fluorescent proteins. **b** Knockdown of p85S6K was confirmed by its reduction of p85S6K expression and the phosphorylation of its downstream effector S6 in PSD-1.  $n = 3$  independent experiments. p-S6: phosphorylated S6. **c** Distance moved in open field test.  $t = 1.305$ ,  $df = 14$ ,  $P = 0.2129$ . **d** Average speed of mice in open field test. **e** Time spent in the inner zone in open field test.  $t = 1.433$ ,  $df = 14$ ,  $P = 0.1738$ .  $n = 8$  mice per group. Data are presented as mean  $\pm$  SEM. Unpaired  $t$  test, two-tailed.



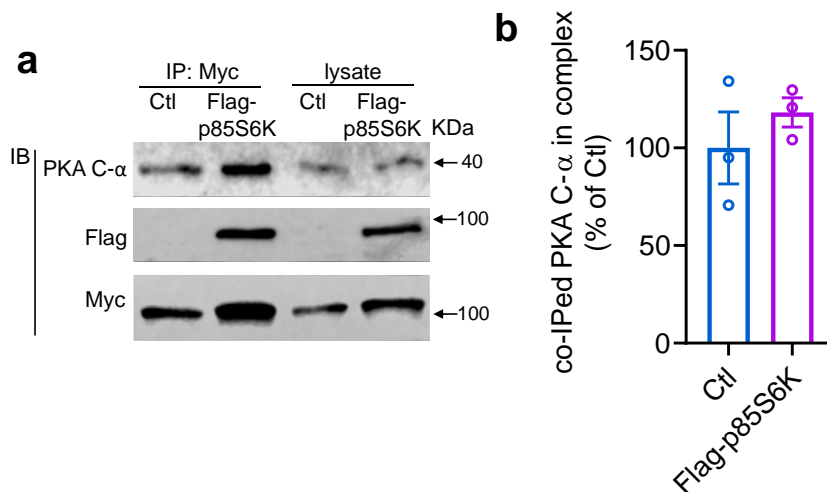

**Fig. S5** p85S6K does not interfere with the interaction between GluA1 and PKA. **a, b** Immunoprecipitation of myc-GluA1 in HEK293 cells transfected myc-GluA1, AKAP79-GFP with or without Flag-p85S6K overexpression.  $n = 3$  independent experiments.  $t = 0.9139$ ,  $df = 4$ ,  $P = 0.4125$ . Data are presented as mean  $\pm$  SEM. Unpaired  $t$  test, two-tailed.

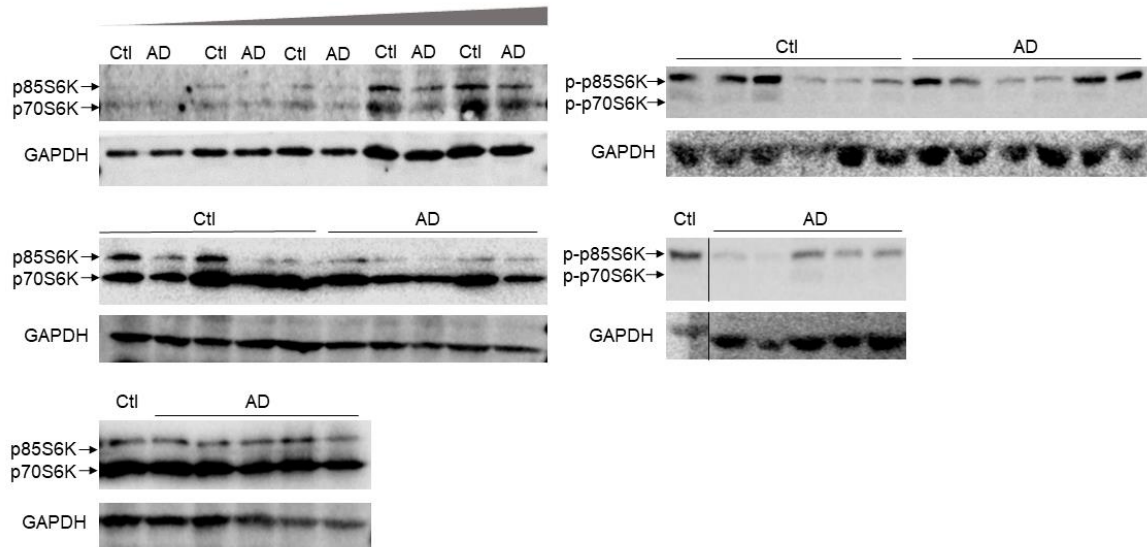

**Fig. S6** The immunoblots of p85S6K/p70S6K and phosphorylated form in remaining human temporal cortex samples related to Fig. 5a.

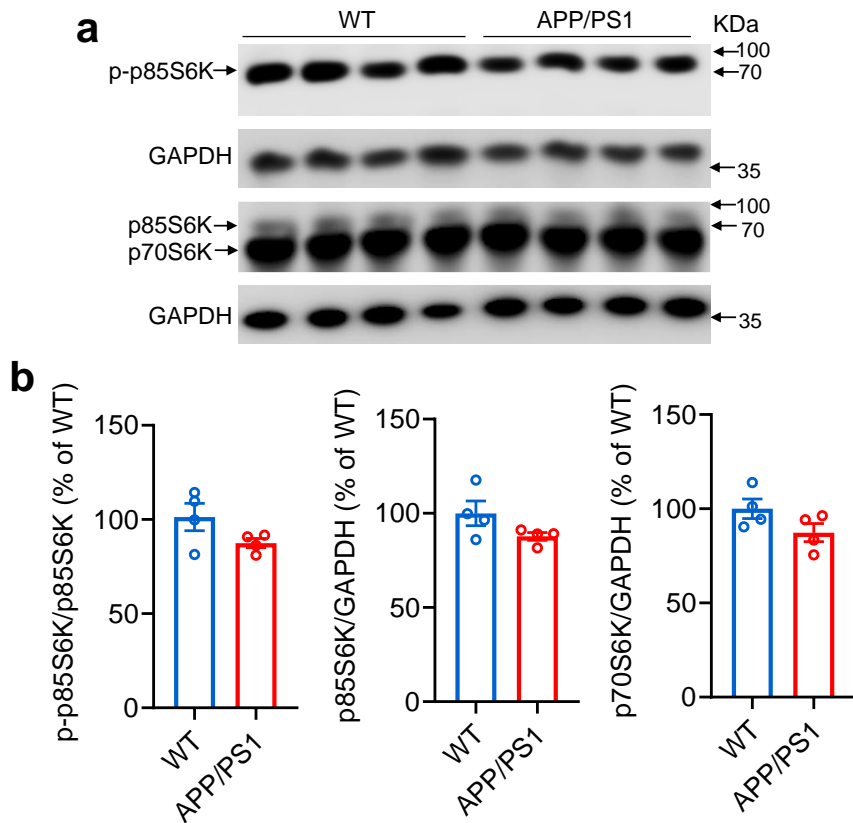

**Fig. S7** p85S6K expression in P2 pellets of cortex of APP/PS1 mice. **a, b** The expression of phosphorylated p85S6K, p85S6K and p70S6K in P2 from fractionation of cortex of 9-month old APP/PS1 mice.  $n = 4$  mice per group.  $t = 1.800$ ,  $df = 6$ ,  $P = 0.1219$  for p-p85S6K,  $t = 1.772$ ,  $df = 6$ ,  $P = 0.1268$  for p85S6K,  $t = 1.791$ ,  $df = 6$ ,  $P = 0.1234$  for p70S6K. Data are presented as mean  $\pm$  SEM. Unpaired  $t$  test, two-tailed (**b**).  
\* $P < 0.05$ .



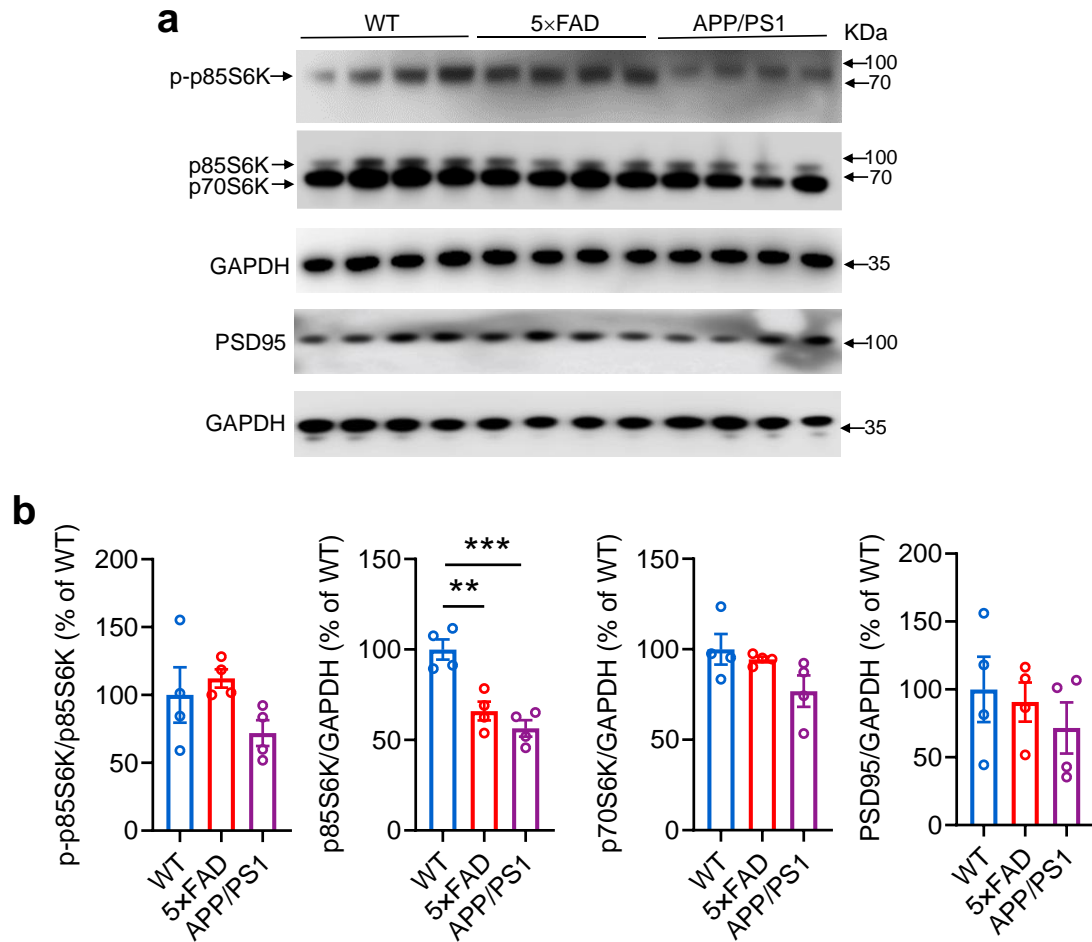

**Fig. S8** p85S6K expression is decreased in PSD-1 of cortex of 5x FAD mice. **a, b** The expression of p85S6K/p70S6K, phosphorylated p85S6K and PSD95 in PSD-1 from fractionation of cortex of 7-month old 5x FAD mice.  $n = 4$  mice per group.  $F = 2.322$ ,  $P = 0.158$  for p-p85S6K,  $F = 19.75$ ,  $P = 0.0005$  for p85S6K,  $F = 2.937$ ,  $P = 0.1043$  for p70S6K and  $F = 0.5528$ ,  $P = 0.5937$  for PSD95. Data are presented as mean  $\pm$  SEM. Ordinary one-way ANOVA followed by Tukey's test.  $**P < 0.01$ ,  $***P < 0.001$ .

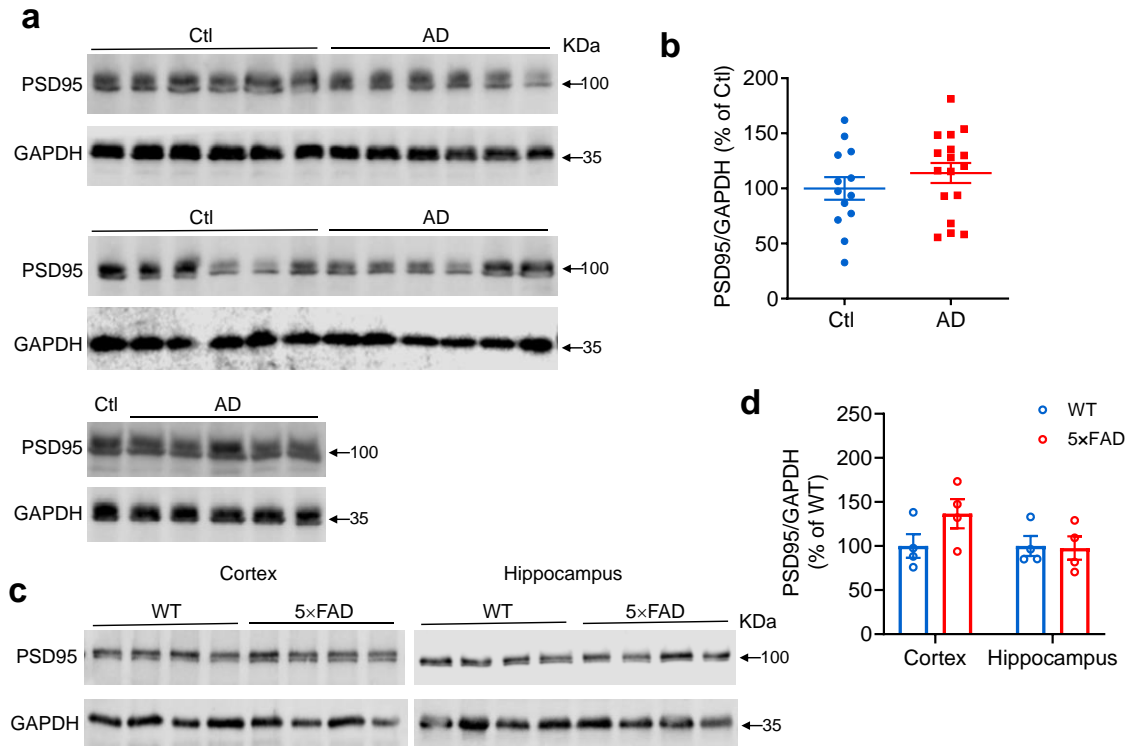

**Fig. S9** PSD95 expression is not altered in AD brains. **a, b** The expression of PSD95 in P2 pellets from fractionation of postmortem temporal cortex from human AD brains and non-demented control (Ctl).  $n = 13$  for Ctl and  $n = 17$  for AD.  $t = 1.020$ ,  $df = 28$ ,  $P = 0.3164$ . **c, d** The expression of PSD95 in P2 pellets from fractionation of cortex and hippocampus of 7-month old 5x FAD mice.  $n = 4$  mice per group.  $t = 1.681$ ,  $df = 6$ ,  $P = 0.1438$  for cortex,  $t = 0.1346$ ,  $df = 28$ ,  $P = 0.8974$  for hippocampus. Data are presented as mean  $\pm$  SEM. Unpaired  $t$  test, two-tailed.

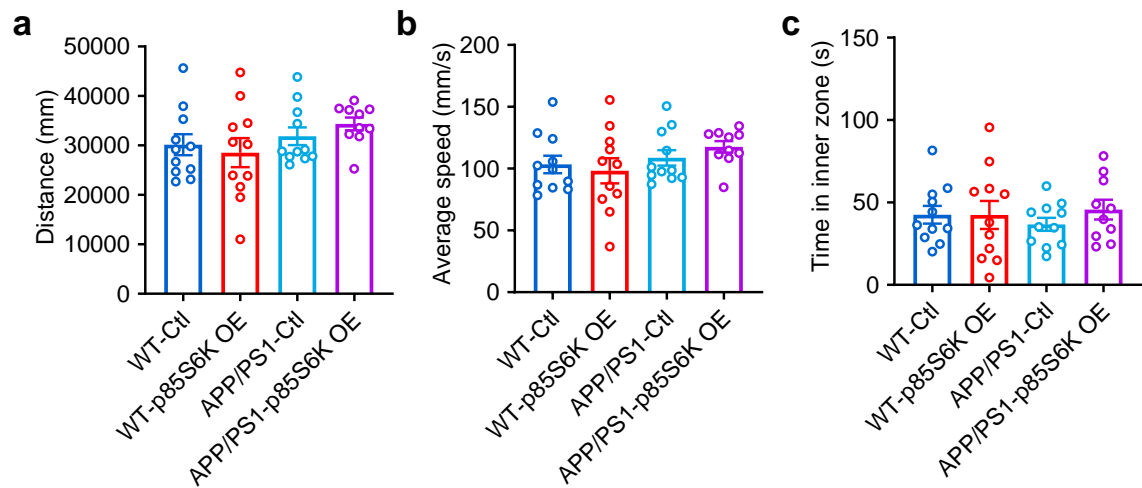

**Fig. S10.** Overexpression of p85S6K does not affect the locomotor activity and anxiety-like behavior. **a** Distance moved in open field test.  $F_{(1, 39)} = 3.083$ ,  $P = 0.0870$  for genotype,  $F_{(1, 39)} = 0.04401$ ,  $P = 0.8349$  for p85S6K expression manipulation. **b** Average speed of mice in open field test. **c** Time spent in the inner zone in open field test.  $F_{(1, 39)} = 0.04231$ ,  $P = 0.8381$  for genotype,  $F_{(1, 39)} = 0.4950$ ,  $P = 0.4859$  for p85S6K expression manipulation.  $n = 11$  mice for WT-Ctl, WT-p85S6K OE, APP/PS1-Ctl and  $n = 10$  for APP/PS1-p85S6K OE. Data are presented as mean  $\pm$  SEM. Two-way ANOVA.

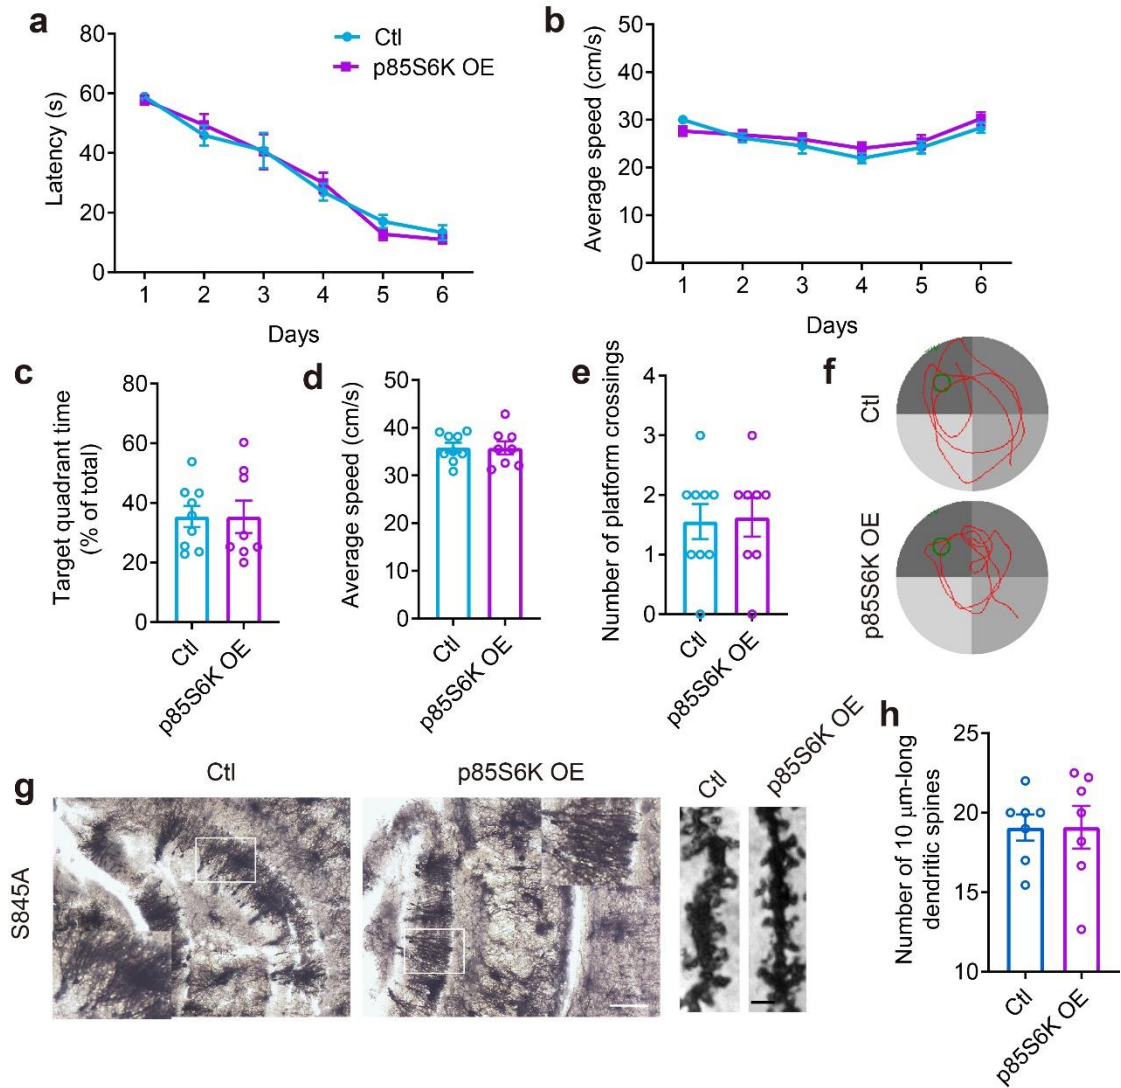

**Fig. S11** Upregulation of p85S6K does not enhance the spatial learning and spine density in S845A mice. **(a-f)** MWM was performed to examine the effect of p85S6K upregulation on spatial learning in S845A mice. **a** Latency of S845A mice to locate the hidden platform in the training period in MWM test.  $F(1, 15) = 0.009521$ ,  $P = 0.9236$ . **b** The average speed of S845A mice in the training period. **c** The time of S845A mice spending in the target quadrant in the probe test.  $t = 0.01373$ ,  $df = 15$ ,  $P = 0.9892$ . **d** The average speed of S845A mice in the probe test. **e** The number of platform crossings of S845A mice in the probe test.  $t = 0.1591$ ,  $df = 15$ ,  $P = 0.8757$ . **f** Representative swimming trajectories in the probe test from different group of mice. The green circle

represented place for the hidden platform.  $n = 9$  mice for Ctl and  $n = 8$  for p85S6K OE (a-f). **(g, h)** Spine density in hippocampus of S845A mice after overexpression of p85S6K. Scale bar: 200  $\mu\text{m}$  and 1  $\mu\text{m}$ .  $n = 7$  slices from 3 mice per group.  $t = 0.01436$ ,  $\text{df} = 12$ .  $P = 0.9888$ . Data are presented as mean  $\pm$  SEM. Repeated measure two-way ANOVA **(a, b)** and unpaired  $t$  test, two-tailed **(c, d, e, h)**.

| <p>query :<br/> MRRRRRRDGFYLPDFRHRHREADMAGVFDIDLDPEDAGSEDELEEGGQLNESMDHGGVG<br/> PYELGMEHCEKFEISETSVNRGPEKIRPECFELLRVLGKGGYGVQVVRKVTGANTGKIF<br/> AMKVLKAMIVRNAKDTAHTKAERNILEEVKHPFIVDLIYAFQTGGKLYLILEYLSGGEL<br/> FMQLEREGIFMEDTACFYLAESMALGHLHQKGIIVRDLPENIMLNHQGHVKLTDGLC<br/> KESIHDGTVTHTFCGTIEYMAPEILMRSGHNRAVDWWSLALMYDMLTGAPPFTGENRKK<br/> TIDKILCKLNLPPYLQEARDLLKLLKRNAASRLGAGPGDAGEVQAHPFRHINWEL<br/> LARKVEPPFKPLLQSEEDVSQFDSKFTRQTPVDSRDDSTLSEANQVFLGFTYVAPSVLE<br/> SVKEKFSFEPKIRSPRRFIGSPRTPVSPVFKFSPGDFWGRGASASTANPQTPEYPMETSG<br/> IEQMDVTVSGEASAPLPIRQPNSGPYKKQAFPMISKRPEHLRMNL</p> |       |     |         |                                                                                                                                                                                                           |                                                                                                                                                                       |
|------------------------------------------------------------------------------------------------------------------------------------------------------------------------------------------------------------------------------------------------------------------------------------------------------------------------------------------------------------------------------------------------------------------------------------------------------------------------------------------------------------------------------------------------------------------------------------------------------|-------|-----|---------|-----------------------------------------------------------------------------------------------------------------------------------------------------------------------------------------------------------|-----------------------------------------------------------------------------------------------------------------------------------------------------------------------|
| <b>Final results predicted by INSP</b>                                                                                                                                                                                                                                                                                                                                                                                                                                                                                                                                                               |       |     |         | The model predicts NLS by the consensus model combined by large-scale frequent pattern mining model and statistical knowledge-based and machine learning SVM-based model with merging (threshold: 0.929). |                                                                                                                                                                       |
| Predicted NLS peptide                                                                                                                                                                                                                                                                                                                                                                                                                                                                                                                                                                                | START | END | SCORE   |                                                                                                                                                                                                           |                                                                                                                                                                       |
| MRRRRRRDGFYLPDFRHRHREADM                                                                                                                                                                                                                                                                                                                                                                                                                                                                                                                                                                             | 1     | 24  | 0.9419  |                                                                                                                                                                                                           |                                                                                                                                                                       |
| PKIRSPRRF                                                                                                                                                                                                                                                                                                                                                                                                                                                                                                                                                                                            | 430   | 438 | 0.93776 |                                                                                                                                                                                                           |                                                                                                                                                                       |
| <b>Statistical knowledge-based and machine learning SVM-based model without merging</b>                                                                                                                                                                                                                                                                                                                                                                                                                                                                                                              |       |     |         |                                                                                                                                                                                                           |                                                                                                                                                                       |
| Predicted NLS peptide                                                                                                                                                                                                                                                                                                                                                                                                                                                                                                                                                                                | START | END | SCORE   | The model selects top5 NLSs predicted by our statistical knowledge-based and machine learning SVM-based model without merging the fragments.                                                              |                                                                                                                                                                       |
| RRRRRRDGFY                                                                                                                                                                                                                                                                                                                                                                                                                                                                                                                                                                                           | 2     | 11  | 0.9419  |                                                                                                                                                                                                           |                                                                                                                                                                       |
| MRRRRRRDGFY                                                                                                                                                                                                                                                                                                                                                                                                                                                                                                                                                                                          | 1     | 11  | 0.94009 |                                                                                                                                                                                                           |                                                                                                                                                                       |
| MRRRRRRDGFYL                                                                                                                                                                                                                                                                                                                                                                                                                                                                                                                                                                                         | 1     | 12  | 0.9379  |                                                                                                                                                                                                           |                                                                                                                                                                       |
| PKIRSPRRF                                                                                                                                                                                                                                                                                                                                                                                                                                                                                                                                                                                            | 430   | 438 | 0.93776 |                                                                                                                                                                                                           |                                                                                                                                                                       |
| MRRRRRRDGFYLPDFRHR                                                                                                                                                                                                                                                                                                                                                                                                                                                                                                                                                                                   | 1     | 19  | 0.93681 |                                                                                                                                                                                                           |                                                                                                                                                                       |
| <b>Large-scale frequent pattern mining model</b>                                                                                                                                                                                                                                                                                                                                                                                                                                                                                                                                                     |       |     |         |                                                                                                                                                                                                           |                                                                                                                                                                       |
| Predicted NLS peptide                                                                                                                                                                                                                                                                                                                                                                                                                                                                                                                                                                                | START | END | ENRICH  | SCORE                                                                                                                                                                                                     | The model selects top3 NLSs in the enrichment score and top3 in the ranking score from the potential NLS database mined by large-scale frequent pattern mining model. |
| MRRRRRR                                                                                                                                                                                                                                                                                                                                                                                                                                                                                                                                                                                              | 1     | 7   | 0.791   | 0.78904                                                                                                                                                                                                   |                                                                                                                                                                       |
| RRRRRR                                                                                                                                                                                                                                                                                                                                                                                                                                                                                                                                                                                               | 2     | 7   | 0.923   | 0.78056                                                                                                                                                                                                   |                                                                                                                                                                       |
| RRRRR                                                                                                                                                                                                                                                                                                                                                                                                                                                                                                                                                                                                | 2     | 6   | 0.608   | 0.77464                                                                                                                                                                                                   |                                                                                                                                                                       |
| RSPRR                                                                                                                                                                                                                                                                                                                                                                                                                                                                                                                                                                                                | 433   | 437 | 0.646   | 0.62686                                                                                                                                                                                                   |                                                                                                                                                                       |

**Fig. S12** The NLS predicted in p85S6K by [www.csbio.sjtu.edu.cn/bioinf/INSP/](http://www.csbio.sjtu.edu.cn/bioinf/INSP/).

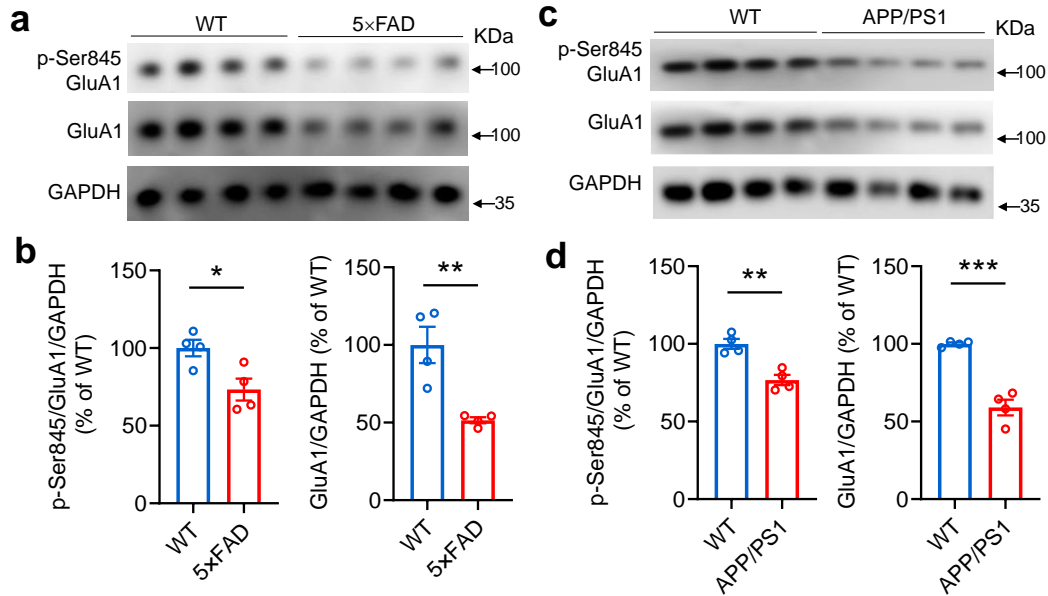

**Fig. S13** The expression of GluA1 and its phosphorylation at Ser845 are reduced in P2 pellets from fractionation of cortex of 7-month old 5xFAD (**a, b**) and 9-month old APP/PS1 (**c, d**) mice.  $n = 4$  mice per group. 5xFAD:  $t = 3.023$ ,  $df = 6$ ,  $P = 0.0233$  for p-Ser845,  $t = 4.104$ ,  $df = 6$ ,  $P = 0.0063$  for GluA1; APP/PS1:  $t = 5.133$ ,  $df = 6$ ,  $P = 0.0022$  for p-Ser845,  $t = 7.981$ ,  $df = 6$ ,  $P = 0.0002$  for GluA1. Data are presented as mean  $\pm$  SEM. Unpaired  $t$  test, two-tailed (**b, d**). \* $P < 0.05$ , \*\* $P < 0.01$ , \*\*\* $P < 0.001$ .
